# Supplementary material for: Monodentate and bridging coordination of 2,5-dimercapto-1,3,4-thiadiazolate to a (2,2′:6′,2″-terpyridine)platinum(ii) center
Source: Royal Society of Chemistry journal article supplement (doi:10.1039/b301390c), 2003-01-01
Supplement: b301390c.pdf [file b301390c.pdf]

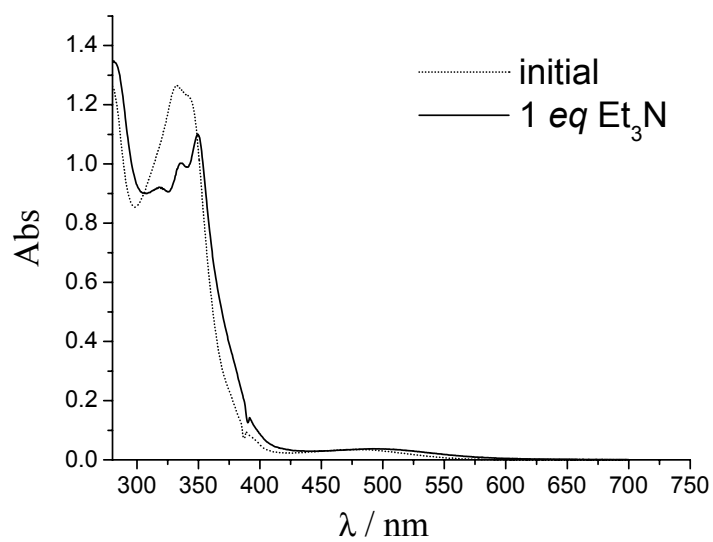

Figure S1. The UV-vis absorption spectra of **2** on the addition of triethylamine. Dotted line: initial, solid line: 1 eq of triethylamine.
